# Supplementary material for: Why do we transition from walking to running? Energy cost and lower leg muscle activity before and after gait transition under body weight support
Source: PeerJ. 2019 Dec 17;7:e8290. doi: 10.7717/peerj.8290 (PMC6924320; doi:10.7717/peerj.8290)
Supplement: Supplemental Information 4 [file peerj-07-8290-s004.csv]

Participant No.	1.33 m/s	1.56 m/s	1.78 m/s	2.00 m/s
1	3.302	3.446	3.386	3.693
2	3.043	3.171	3.208	3.467
3	3.585	3.367	3.582	3.901
4	3.786	3.544	3.479	3.552
5	2.778	2.687	2.685	3.060
6	3.169	3.076	3.600	4.522
7	3.329	3.104	3.144	3.390
8	2.803	2.757	2.735	2.977
9	3.647	3.488	3.416	3.591
10	2.997	2.731	2.831	3.175
11	3.601	3.574	3.444	3.400
12	3.234	3.117	3.227	3.293
13	3.341	3.282	3.132	3.176
